# Supplementary material
Source: PubMed Central journal article supplement (PMC5038049)
Supplement: AEM.01540-16_zam999117429so1.pdf [file AEM.01540-16_zam999117429so1.pdf]

**Table S1 Detection rates and mean counts of target groups of *Clostridium difficile* in healthy Belgian infants by qPCR**

| Stool specimen (N) | CD16SrRNA-F/R/P    |                                |  | tcdA-F/R/P         |                                |  | tcdB-F/R/P         |                                |  |
|--------------------|--------------------|--------------------------------|--|--------------------|--------------------------------|--|--------------------|--------------------------------|--|
|                    | Detection rate (%) | Count <sup>a</sup> (Mean ± SD) |  | Detection rate (%) | Count <sup>a</sup> (Mean ± SD) |  | Detection rate (%) | Count <sup>a</sup> (Mean ± SD) |  |
| Meconium (99)      | 0/99 (0)           | -                              |  | 0/99 (0)           | -                              |  | 0/99 (0)           | -                              |  |
| Day 3 (83)         | 5/83 (6)           | 7.6 ± 1.1                      |  | 2/83 (2)           | 7.2                            |  | 2/83 (2)           | 7.0                            |  |
| Day 7 (100)        | 6/100 (6)          | 6.9 ± 1.9                      |  | 2/100 (2)          | 7.4                            |  | 2/100 (2)          | 7.3                            |  |
| Day 30 (108)       | 10/108 (9)         | 6.7 ± 1.1                      |  | 3/108 (3)          | 7.0 ± 1.5                      |  | 3/108 (2)          | 6.9 ± 1.4                      |  |
| Day 90 (107)       | 13/107 (12)        | 6.8 ± 0.9                      |  | 4/107 (4)          | 7.0 ± 1.3                      |  | 5/107 (5)          | 7.0 ± 1.3                      |  |
| Weaning (75)       | 23/75 (31)         | 7.0 ± 1.0                      |  | 8/75 (11)          | 7.4 ± 1.1                      |  | 10/75 (13)         | 7.3 ± 1.0                      |  |
| Day 180 (105)      | 47/105 (45)        | 6.7 ± 1.0                      |  | 14/105 (13)        | 6.9 ± 0.6                      |  | 16/105 (15)        | 6.9 ± 0.7                      |  |

<sup>a</sup> log<sub>10</sub> cells/g of stool

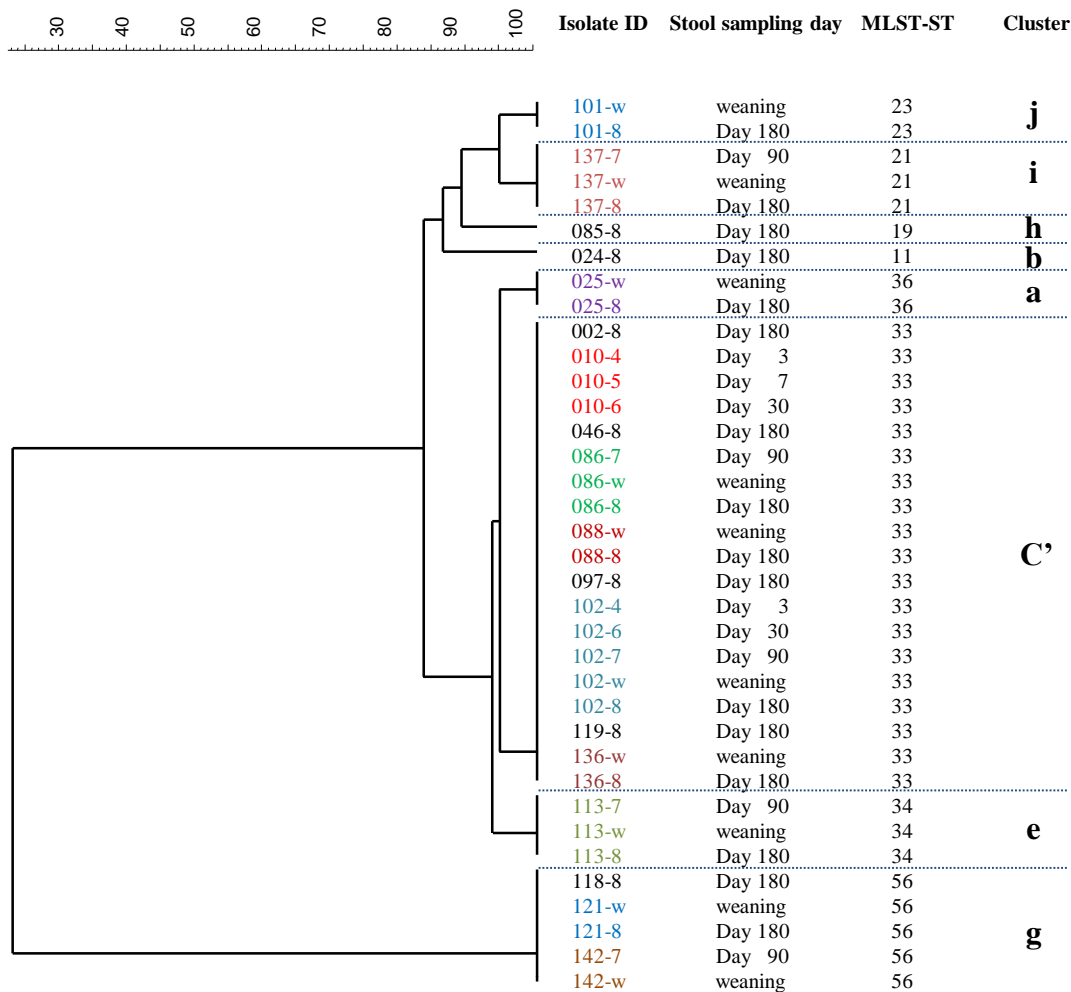

**Fig. S1 Dendrogram of toxigenic *Clostridium difficile* isolates from infants, as determined by MLST analysis**

The dendrogram was created with a multiscale setting for comparison and the unweighted pair group method with arithmetic mean for clustering. Isolate ID is composed of the subject ID (3 digits) and a number indicating the day of sampling of the stool specimen (#4: day 3; #5: day 7; #6: day 30; #7: day 90; #8: day 180; #w: weaning). The MLST database was queried for the sequences of 7 genes of each isolate of *C. difficile*, and a matched sequencing type (ST) of 2 digits was assigned to each strain. The compositions of clusters with the same cluster letters in the MLST analysis were equivalent to those in CGE-PCR ribotyping. The cluster C' was composed of isolates that belonged to clusters c, d and f in CGE-PCR ribotyping.

**Table S2 Counts of total bacteria and *Clostridium difficile* in stools of 55 *C. difficile*-positive infants**

| Subject ID | Day 3                               |                                         |                | Day 7                               |                                         |                | Day 30                              |                                         |                | Day 90                              |                                         |                | Weaning                             |                                         |                | Day 180                             |                                         |                |
|------------|-------------------------------------|-----------------------------------------|----------------|-------------------------------------|-----------------------------------------|----------------|-------------------------------------|-----------------------------------------|----------------|-------------------------------------|-----------------------------------------|----------------|-------------------------------------|-----------------------------------------|----------------|-------------------------------------|-----------------------------------------|----------------|
|            | Total bacterial counts <sup>a</sup> | <i>C. difficile</i> counts <sup>b</sup> | Toxigenic type | Total bacterial counts <sup>a</sup> | <i>C. difficile</i> counts <sup>b</sup> | Toxigenic type | Total bacterial counts <sup>a</sup> | <i>C. difficile</i> counts <sup>b</sup> | Toxigenic type | Total bacterial counts <sup>a</sup> | <i>C. difficile</i> counts <sup>b</sup> | Toxigenic type | Total bacterial counts <sup>a</sup> | <i>C. difficile</i> counts <sup>b</sup> | Toxigenic type | Total bacterial counts <sup>a</sup> | <i>C. difficile</i> counts <sup>b</sup> | Toxigenic type |
| 001        | 9.8                                 | -                                       | -              | 9.9                                 | -                                       | -              | 9.4                                 | -                                       | -              | 10.8                                | -                                       | -              | No sample                           | -                                       | -              | 10.1                                | 5.6                                     | A-B-           |
| 002        | 10.4                                | -                                       | -              | 10.3                                | -                                       | -              | 10.6                                | -                                       | -              | 10.9                                | -                                       | -              | No sample                           | -                                       | -              | 9.9                                 | 7.4                                     | A+B+           |
| 004        | 8.8                                 | -                                       | -              | 10.3                                | -                                       | -              | 10.5                                | -                                       | -              | 10.6                                | -                                       | -              | 10.5                                | 7.9                                     | A-B-           | 10.1                                | 5.1                                     | A-B-           |
| 008        | -                                   | No sample                               | -              | 10.7                                | -                                       | -              | 10.4                                | -                                       | -              | 10.9                                | -                                       | -              | 10.5                                | 7.4                                     | A-B-           | 10.8                                | 7.2                                     | A-B-           |
| 010        | 9.3                                 | 8.3                                     | A+B+           | 9.9                                 | 8.7                                     | A+B+           | 10.3                                | 8.3                                     | A+B+           | 10.6                                | -                                       | -              | No sample                           | -                                       | -              | 10.3                                | -                                       | -              |
| 013        | 11.0                                | -                                       | -              | 10.9                                | -                                       | -              | 10.7                                | -                                       | -              | 10.9                                | -                                       | -              | 10.9                                | 5.7                                     | A-B-           | 10.9                                | 7.5                                     | A-B-           |
| 014        | 10.0                                | -                                       | -              | 10.8                                | -                                       | -              | 11.2                                | -                                       | -              | 10.8                                | -                                       | -              | No sample                           | -                                       | -              | 10.4                                | 7.7                                     | A-B-           |
| 018        | 10.0                                | -                                       | -              | 9.9                                 | -                                       | -              | 9.9                                 | -                                       | -              | 11.1                                | -                                       | -              | 10.7                                | -                                       | -              | 11.2                                | 8.7                                     | A-B-           |
| 019        | 9.7                                 | -                                       | -              | No sample                           | -                                       | -              | 10.9                                | 8.3                                     | A-B-           | 11.3                                | -                                       | -              | No sample                           | -                                       | -              | 10.3                                | -                                       | -              |
| 024        | 10.7                                | -                                       | -              | 10.3                                | -                                       | -              | 10.9                                | -                                       | -              | 11.3                                | -                                       | -              | No sample                           | -                                       | -              | 11.0                                | 8.0                                     | A+B+           |
| 025        | -                                   | No sample                               | -              | No sample                           | -                                       | -              | 10.7                                | -                                       | -              | No sample                           | -                                       | -              | 10.3                                | 4.5                                     | A+B+           | 10.0                                | 6.9                                     | A+B+           |
| 028        | 10.2                                | -                                       | -              | No sample                           | -                                       | -              | -                                   | -                                       | -              | 11.3                                | -                                       | -              | 11.0                                | -                                       | -              | 10.5                                | 5.4                                     | A-B-           |
| 029        | 10.4                                | -                                       | -              | 10.3                                | -                                       | -              | 10.9                                | -                                       | -              | 9.5                                 | 5.6                                     | A-B-           | 9.8                                 | -                                       | -              | 10.4                                | 7.2                                     | A-B-           |
| 030        | -                                   | No sample                               | -              | 9.9                                 | -                                       | -              | 10.5                                | -                                       | -              | 10.4                                | -                                       | -              | 10.7                                | -                                       | -              | 10.3                                | 7.2                                     | A-B-           |
| 033        | -                                   | No sample                               | -              | 10.0                                | -                                       | -              | 10.7                                | 7.2                                     | A-B-           | 10.4                                | -                                       | -              | 10.9                                | -                                       | -              | 9.7                                 | 7.4                                     | A-B-           |
| 037        | 9.8                                 | -                                       | -              | 9.4                                 | -                                       | -              | 10.0                                | -                                       | -              | 10.5                                | -                                       | -              | No sample                           | -                                       | -              | 10.6                                | 8.0                                     | A-B-           |
| 039        | -                                   | No sample                               | -              | 10.4                                | -                                       | -              | 10.7                                | -                                       | -              | 11.1                                | 7.2                                     | A-B-           | 10.7                                | 7.0                                     | A-B-           | 10.0                                | 7.1                                     | A-B-           |
| 040        | 9.7                                 | 8.3                                     | A-B-           | -                                   | No sample                               | -              | 10.7                                | 6.2                                     | -              | 10.5                                | 7.4                                     | A-B-           | No sample                           | -                                       | -              | 9.6                                 | -                                       | -              |
| 041        | 9.8                                 | 7.7                                     | A-B-           | 9.8                                 | 4.3                                     | A-B-           | 10.6                                | 5.2                                     | A-B-           | 10.3                                | -                                       | -              | No sample                           | -                                       | -              | No sample                           | -                                       | -              |
| 043        | 9.9                                 | -                                       | -              | 9.6                                 | -                                       | -              | 10.0                                | -                                       | -              | 10.9                                | -                                       | -              | No sample                           | -                                       | -              | 10.3                                | 6.3                                     | A-B-           |
| 044        | -                                   | No sample                               | -              | 10.3                                | -                                       | -              | 10.2                                | -                                       | -              | 10.8                                | 7.0                                     | A-B-           | 11.2                                | 8.2                                     | A-B-           | 10.6                                | 4.8                                     | A-B-           |
| 046        | -                                   | No sample                               | -              | 10.7                                | 8.8                                     | A-B-           | 10.4                                | 6.6                                     | A-B-           | 10.5                                | 7.5                                     | A-B-           | 10.8                                | 5.8                                     | A-B-           | 10.0                                | 6.1                                     | A+B+           |
| 052        | 7.7                                 | -                                       | -              | 9.9                                 | -                                       | -              | 10.3                                | -                                       | -              | 10.4                                | -                                       | -              | No sample                           | -                                       | -              | 10.2                                | 7.4                                     | A-B-           |
| 055        | -                                   | No sample                               | -              | 10.5                                | -                                       | -              | 10.2                                | -                                       | -              | 10.4                                | -                                       | -              | No sample                           | -                                       | -              | 9.9                                 | 6.5                                     | A-B-           |
| 060        | -                                   | No sample                               | -              | 10.0                                | 8.3                                     | A-B-           | 10.4                                | 5.7                                     | A-B-           | 10.5                                | 6.0                                     | A-B-           | No sample                           | -                                       | -              | 10.2                                | -                                       | -              |
| 061        | -                                   | No sample                               | -              | 10.5                                | -                                       | -              | 10.3                                | -                                       | -              | 10.9                                | -                                       | -              | 10.4                                | 7.4                                     | A-B-           | 10.5                                | 7.3                                     | A-B-           |
| 065        | 10.4                                | -                                       | -              | 10.1                                | -                                       | -              | 10.3                                | -                                       | -              | 10.7                                | 6.9                                     | A-B-           | 10.3                                | -                                       | -              | 10.4                                | -                                       | -              |
| 068        | 9.8                                 | 8.2                                     | A-B-           | 10.4                                | 5.6                                     | A-B-           | 10.5                                | 7.7                                     | A-B-           | 10.5                                | -                                       | -              | 10.1                                | -                                       | -              | 10.3                                | 4.6                                     | A-B-           |
| 071        | -                                   | No sample                               | -              | No sample                           | -                                       | -              | 10.9                                | -                                       | -              | No sample                           | -                                       | -              | 10.0                                | 5.4                                     | A-B-           | 10.2                                | 7.4                                     | A-B-           |
| 074        | 10.7                                | -                                       | -              | 11.1                                | -                                       | -              | 10.4                                | -                                       | -              | 10.7                                | -                                       | -              | 10.6                                | -                                       | -              | 9.6                                 | 5.9                                     | A-B-           |
| 078        | -                                   | No sample                               | -              | No sample                           | -                                       | -              | 9.8                                 | -                                       | -              | 10.4                                | -                                       | -              | 10.4                                | -                                       | -              | 10.8                                | 7.3                                     | A-B-           |
| 080        | 9.8                                 | -                                       | -              | 10.4                                | -                                       | -              | No sample                           | -                                       | -              | 10.9                                | -                                       | -              | 10.7                                | 6.6                                     | A-B-           | 7.6                                 | -                                       | -              |
| 085        | 9.8                                 | -                                       | -              | 9.9                                 | -                                       | -              | 10.0                                | -                                       | -              | 10.4                                | -                                       | -              | 10.1                                | 7.0                                     | A-B-           | 10.4                                | 7.3                                     | A+B+           |
| 086        | 10.3                                | -                                       | -              | 10.6                                | -                                       | -              | 10.5                                | -                                       | -              | 10.2                                | 6.4                                     | A+B+           | 10.6                                | 7.4                                     | A+B+           | 10.1                                | 5.7                                     | A+B+           |
| 088        | 10.1                                | -                                       | -              | 10.2                                | -                                       | -              | 9.9                                 | -                                       | -              | 9.9                                 | -                                       | -              | 10.2                                | 6.9                                     | A+B+           | 10.3                                | 6.4                                     | A+B+           |
| 092        | 9.5                                 | -                                       | -              | 10.5                                | -                                       | -              | 10.2                                | -                                       | -              | 9.7                                 | -                                       | -              | 10.4                                | 5.0                                     | A-B-           | 10.3                                | 6.2                                     | A-B-           |
| 097        | 10.1                                | -                                       | -              | 10.1                                | -                                       | -              | 9.9                                 | -                                       | -              | 10.3                                | -                                       | -              | 10.4                                | -                                       | -              | 10.7                                | 6.7                                     | A+B+           |
| 101        | 9.1                                 | -                                       | -              | No sample                           | -                                       | -              | 10.1                                | -                                       | -              | 9.4                                 | -                                       | -              | 10.3                                | 7.5                                     | A+B+           | 10.2                                | 6.6                                     | A+B+           |
| 102        | 10.1                                | 5.8                                     | A+B+           | 10.4                                | -                                       | -              | 10.1                                | 5.6                                     | A+B+           | 10.3                                | 5.4                                     | A+B+           | 10.5                                | 7.2                                     | A+B+           | 10.7                                | 6.0                                     | A+B+           |
| 105        | 10.5                                | -                                       | -              | 10.5                                | -                                       | -              | 10.9                                | -                                       | -              | 10.6                                | -                                       | -              | No sample                           | -                                       | -              | 10.3                                | 5.1                                     | A-B-           |
| 109        | 9.8                                 | -                                       | -              | 10.0                                | -                                       | -              | 10.8                                | -                                       | -              | 10.8                                | -                                       | -              | 10.6                                | -                                       | -              | 10.7                                | 7.1                                     | A-B-           |
| 110        | -                                   | No sample                               | -              | 9.6                                 | -                                       | -              | 9.9                                 | -                                       | -              | 10.4                                | -                                       | -              | 10.3                                | -                                       | -              | 10.2                                | 5.5                                     | A-B-           |
| 113        | -                                   | No sample                               | -              | 9.6                                 | 5.8                                     | A+B+           | 10.0                                | 6.4                                     | A+B+           | 9.9                                 | 6.8                                     | A+B+           | 10.3                                | 7.6                                     | A+B+           | 10.7                                | 6.7                                     | A+B+           |
| 117        | 9.9                                 | -                                       | -              | 10.1                                | -                                       | -              | 9.9                                 | -                                       | -              | 9.7                                 | -                                       | -              | 10.7                                | -                                       | -              | 10.6                                | 6.8                                     | A-B-           |
| 118        | 10.1                                | -                                       | -              | 9.6                                 | -                                       | -              | 10.0                                | -                                       | -              | 10.0                                | -                                       | -              | 10.4                                | -                                       | -              | 10.8                                | 7.9                                     | A+B+           |
| 119        | 10.1                                | -                                       | -              | 10.3                                | -                                       | -              | No sample                           | -                                       | -              | No sample                           | -                                       | -              | No sample                           | -                                       | -              | 10.6                                | 7.3                                     | A+B+           |
| 121        | 9.4                                 | -                                       | -              | 9.6                                 | -                                       | -              | 10.0                                | -                                       | -              | 10.2                                | -                                       | -              | 10.4                                | 6.7                                     | A-B+           | 10.0                                | 5.9                                     | A-B+           |
| 123        | 9.5                                 | -                                       | -              | 9.2                                 | -                                       | -              | 10.1                                | -                                       | -              | 10.5                                | 6.8                                     | A-B-           | 10.5                                | 7.4                                     | A-B-           | 10.5                                | 7.2                                     | A-B-           |
| 126        | 9.8                                 | -                                       | -              | 9.7                                 | -                                       | -              | 10.2                                | -                                       | -              | 10.4                                | -                                       | -              | 10.7                                | 8.1                                     | A-B-           | 10.3                                | 7.0                                     | A-B-           |
| 130        | 9.6                                 | -                                       | -              | 9.9                                 | -                                       | -              | 10.6                                | -                                       | -              | 11.1                                | -                                       | -              | 10.8                                | -                                       | -              | 10.2                                | 4.9                                     | A-B-           |
| 133        | -                                   | No sample                               | -              | 10.0                                | -                                       | -              | 10.5                                | -                                       | -              | 10.2                                | -                                       | -              | 11.0                                | -                                       | -              | 10.8                                | 7.9                                     | A-B-           |
| 136        | -                                   | No sample                               | -              | 10.0                                | -                                       | -              | 9.8                                 | -                                       | -              | 10.6                                | -                                       | -              | 10.7                                | 8.1                                     | A+B+           | 10.4                                | 6.9                                     | A+B+           |
| 137        | -                                   | No sample                               | -              | 10.2                                | -                                       | -              | 10.2                                | -                                       | -              | 10.6                                | 8.8                                     | A+B+           | 10.6                                | 7.9                                     | A+B+           | 10.4                                | 7.0                                     | A+B+           |
| 138        | 10.0                                | -                                       | -              | 9.7                                 | -                                       | -              | 9.8                                 | -                                       | -              | 9.9                                 | -                                       | -              | No sample                           | -                                       | -              | 10.8                                | 7.8                                     | A-B-           |
| 142        | -                                   | No sample                               | -              | 10.1                                | -                                       | -              | 9.6                                 | -                                       | -              | 10.9                                | 7.2                                     | A-B+           | 10.7                                | 7.8                                     | A-B+           | No sample                           | -                                       | -              |

<sup>a</sup> The number of total stool bacteria was determined by 4', 6-diamidino-2-phenylindole (DAPI) staining method.

<sup>b</sup> The number of *C. difficile* was determined by qPCR for 16S rRNA gene.
